# Supplementary material for: Reassessment of Annamocarya sinesis (Carya sinensis) Taxonomy through Concatenation and Coalescence Phylogenetic Analysis
Source: MDPI journal article supplement (doi:10.3390/plants11010052), 2021-12-24
Supplement: s1 [file s1]

Supplementary Table S1: Assembled chloroplast genome of 10 species

| Assemble Species             | SRA (From NCBI) | Reference species     | Reference chloroplast genome of NCBI |
|------------------------------|-----------------|-----------------------|--------------------------------------|
| <i>Carya aquatica</i>        | SRR6804841      | <i>C. illinoensis</i> | MH909600                             |
| <i>Carya cordiformis</i>     | SRR6804840      | <i>C. illinoensis</i> | MH909600                             |
| <i>Carya dabieshanensis</i>  | SRR6804849      | <i>C. cathayensis</i> | NC_046572                            |
| <i>Carya glabra</i>          | SRR6804848      | <i>C. illinoensis</i> | MH909600                             |
| <i>Carya laciniosa</i>       | SRR6804855      | <i>C. illinoensis</i> | MH909600                             |
| <i>Carya myristiciformis</i> | SRR6804845      | <i>C. illinoensis</i> | MH909600                             |
| <i>Carya ovata</i>           | SRR6804846      | <i>C. illinoensis</i> | MH909600                             |
| <i>Carya palmeri</i>         | SRR6804847      | <i>C. illinoensis</i> | MH909600                             |
| <i>Carya texana</i>          | SRR6804850      | <i>C. illinoensis</i> | MH909600                             |
| <i>Carya tomentosa</i>       | SRR6804842      | <i>C. illinoensis</i> | MH909600                             |

Supplementary Table S2: Complete chloroplast genome of 15 species from NCBI

| Species                     | NCBI accession | Species                       | NCBI accession |
|-----------------------------|----------------|-------------------------------|----------------|
| <i>Annamocarya sinensis</i> | MN911165.1     | <i>Juglans hopeiensis</i>     | NC_033894.1    |
| <i>Betula platyphylla</i>   | MH205735.1     | <i>Juglans major</i>          | NC_035966.1    |
| <i>Carya cathayensis</i>    | NC_046572.1    | <i>Juglans nigra</i>          | NC_035967.1    |
| <i>Carya hunanensis</i>     | NC_046435.1    | <i>Juglans regia</i>          | MF167463.1     |
| <i>Carya kweichowensis</i>  | NC_040864.1    | <i>Pterocarya hupehensis</i>  | NC_046431.1    |
| <i>Cyclocarya paliurus</i>  | NC_034315.1    | <i>Pterocarya stenoptera</i>  | NC_046428.1    |
| <i>Juglans cathayensis</i>  | NC_033893.1    | <i>Platycarya strobilacea</i> | NC_035413.1    |
| <i>Juglans cinerea</i>      | NC_035960.1    |                               |                |

Supplementary Table S3: NCBI accession number of assembled chloroplast genome

| Species                     | Accession | Species                      | Accession |
|-----------------------------|-----------|------------------------------|-----------|
| <i>Carya aquatica</i>       | BK061153  | <i>Carya myristiciformis</i> | BK061158  |
| <i>Carya cordiformis</i>    | BK061154  | <i>Carya ovata</i>           | BK061159  |
| <i>Carya dabieshanensis</i> | BK061155  | <i>Carya palmeri</i>         | BK061160  |
| <i>Carya glabra</i>         | BK061156  | <i>Carya texana</i>          | BK061161  |
| <i>Carya laciniosa</i>      | BK061157  | <i>Carya tomentosa</i>       | BK061162  |

Supplementary Table S4: Mutual coding genes within all 26 chloroplast genomes (73 in total)

| Gene ID     |             |             |              |              |             |
|-------------|-------------|-------------|--------------|--------------|-------------|
| <i>accD</i> | <i>ndhD</i> | <i>petN</i> | <i>psbJ</i>  | <i>rpl33</i> | <i>rps3</i> |
| <i>atpA</i> | <i>ndhE</i> | <i>psaA</i> | <i>psbK</i>  | <i>rpl36</i> | <i>rps4</i> |
| <i>atpB</i> | <i>ndhF</i> | <i>psaB</i> | <i>psbL</i>  | <i>rpoA</i>  | <i>rps7</i> |
| <i>atpE</i> | <i>ndhG</i> | <i>psaC</i> | <i>psbM</i>  | <i>rpoB</i>  | <i>rps8</i> |
| <i>atpF</i> | <i>ndhH</i> | <i>psaI</i> | <i>psbT</i>  | <i>rpoC1</i> | <i>ycf1</i> |
| <i>atpH</i> | <i>ndhI</i> | <i>psaJ</i> | <i>rbcL</i>  | <i>rpoC2</i> | <i>ycf2</i> |
| <i>atpI</i> | <i>ndhJ</i> | <i>psbA</i> | <i>rpl14</i> | <i>rps11</i> | <i>ycf3</i> |
| <i>ccsA</i> | <i>ndhK</i> | <i>psbC</i> | <i>rpl16</i> | <i>rps12</i> | <i>ycf4</i> |
| <i>cemA</i> | <i>petA</i> | <i>psbD</i> | <i>rpl2</i>  | <i>rps14</i> |             |
| <i>matK</i> | <i>petB</i> | <i>psbE</i> | <i>rpl20</i> | <i>rps15</i> |             |
| <i>ndhA</i> | <i>petD</i> | <i>psbF</i> | <i>rpl22</i> | <i>rps18</i> |             |
| <i>ndhB</i> | <i>petG</i> | <i>psbH</i> | <i>rpl23</i> | <i>rps19</i> |             |
| <i>ndhC</i> | <i>petL</i> | <i>psbI</i> | <i>rpl32</i> | <i>rps2</i>  |             |
